# Supplementary material
Source: Research Square preprint supplement (doi:10.21203/rs.3.rs-10144336/v1)
Supplement: Supplementary file 1 [file b5bd1446deca4b6a72316cf2.docx]

**Appendix A: Search Terms and Database Search Results**

| **Database Searched:** | **Medline** | **Search Updated:** | **PsycInfo** | **Search Updated:** | **CINAHL** | **Search Updated:** | **Web of Science** | **Search Updated:** | **Embase** | **Search Updated:** |
| --- | --- | --- | --- | --- | --- | --- | --- | --- | --- | --- |
| **Platform of Database:** | Ovid | 6/1/2026 | Ovid | 6/2/2026 | EBSCO | 6/7/2026 | Clarivate | 6/7/2026 | Elsevier | 6/7/2026 |
| **Database Scope:** | Ovid MEDLINE(R) and Epub Ahead of Print, In-Process, In-Data-Review & Other Non-Indexed Citations, Daily and Versions are indexed beginning in 1946 and continue to the date of search listed above. | | APA PsycInfo covers the period from 1806 and continue to the date of search listed above, with some records dating back to 1707. | | Indexing goes back to 1937, though the availability of full text for specific journals within the database can vary. Full-text coverage depends on the specific version of the CINAHL database (e.g., CINAHL Complete, CINAHL Ultimate) and the individual agreements EBSCO has with publishers. Some full text may also start from 1937, while other journals might have full-text coverage starting later. | | Web of Science Core Collection Citation Indexes covers the period of 1900 to the date of search listed above. | | The Embase database from Elsevier covers biomedical literature from 1974 to the date of search listed above. | |
| **Filters/Limiters Used:** | No filters applied | | No filters applied | | No filters applied | | No filters applied | | No filters applied | |
|  | Correctional Facilities/ or Incarceration/ or Jails/ or Jurisprudence/ or Prisoners/ or Prisons/ or Recidivism | 61183 | Correctional Institutions/ or Incarcerated/ or Incarceration/ or "law (government)"/ or Prisons/ or Recidivism/ | 34358 | MH "Correctional Facilities" or MH "Incarceration" or MH "Jurisprudence" or MH "Prisoners" | 23,508 | TS=(carcera* or convict* or correction* or detained* or detention* or "ex-convict*" or felon* or "halfway house*" or imprison* or incarcerat* or inmate* or jail* or jurisprudence* or justice* or misdemeanor* or parole* or penitentiar* or "post-release*" or prison* or probation* or recidivism*) | 1119866 | correctional facility'/de OR 'incarceration'/de OR 'institutionalization'/de OR 'jurisprudence'/de OR 'prisoner'/de OR 'recidivism'/de | 89,544 |
|  | (carcera* or convict* or correction* or detained* or detention* or "ex-convict*" or felon* or "halfway house*" or imprison* or incarcerat* or inmate* or jail* or jurisprudence* or justice* or misdemeanor* or parole* or penitentiar* or "post-release*" or prison* or probation* or recidivism*).ab,kf,kw,ti. | 445427 | (carcera* or convict* or correction* or detained* or detention* or "ex-convict*" or felon* or "halfway house*" or imprison* or incarcerat* or inmate* or jail* or jurisprudence* or justice* or misdemeanor* or parole* or penitentiar* or "post-release*" or prison* or probation* or recidivism*).ab,id,ti. | 194208 | XB (carcera* or convict* or correction* or detained* or detention* or "ex-convict*" or felon* or "halfway house*" or imprison* or incarcerat* or inmate* or jail* or jurisprudence* or justice* or misdemeanor* or parole* or penitentiar* or "post-release*" or prison* or probation* or recidivism*) | 103,127 | TS=((penal or detention or correction or correctional) N1 (center or centers or camp or camps or facility or facilities or institution or institutions or system or systems)) | 48 | carcera*:ab,kw,ti OR convict*:ab,kw,ti OR correction*:ab,kw,ti OR detained*:ab,kw,ti OR detention*:ab,kw,ti OR 'ex-convict*':ab,kw,ti OR felon*:ab,kw,ti OR 'halfway house*':ab,kw,ti OR imprison*:ab,kw,ti OR incarcerat*:ab,kw,ti OR inmate*:ab,kw,ti OR jail*:ab,kw,ti OR jurisprudence*:ab,kw,ti OR justice*:ab,kw,ti OR misdemeanor*:ab,kw,ti OR parole*:ab,kw,ti OR penitentiar*:ab,kw,ti OR 'post-release*':ab,kw,ti OR prison*:ab,kw,ti OR probation*:ab,kw,ti OR recidivism*:ab,kw,ti | 566100 |
|  | ((penal or detention or correction or correctional) adj (center or centers or camp or camps or facility or facilities or institution or institutions or system or systems)).ab,kf,kw,ti. | 4243 | ((penal or detention or correction or correctional) adj (center or centers or camp or camps or facility or facilities or institution or institutions or system or systems)).ab,id,ti. | 6574 | ((penal or detention or correction or correctional) N1 (center or centers or camp or camps or facility or facilities or institution or institutions or system or systems)) | 2,398 | #1 OR #2 | 1,119,866 | ((penal OR detention OR correction OR correctional) NEXT/1 (center OR centers OR camp OR camps OR facility OR facilities OR institution OR institutions OR system OR systems)):ab,kw,ti | 66 |
|  | 1 or 2 or 3 | 475944 | 1 or 2 or 3 | 196156 | S1 or S2 or S3 | 114,097 | TS=(cogniti* N1 (disorder* or dysfunction* or impairment* or decline* or deficit* or function*)) | 947 | #1 OR #2 OR #3 | 616704 |
|  | Cognitive Dysfunction/ or exp Dementia/ | 275177 | Cognitive Impairment/ or Dementia/ | 93417 | MH "Cognition Disorders" or MH "Dementia" | 87,133 | TS=(ADRD or dementia* or Alzheimer* or "mental impairment*" or MCI or "mental deterioration*" or neurodegeneration* or "neuro-degeneration*") | 576022 | cognitive defect'/de OR 'dementia'/exp | 794360 |
|  | (cogniti* adj (disorder* or dysfunction* or impairment* or decline* or deficit* or function*)).ab,kf,kw,ti. | 271463 | (cogniti* adj (disorder* or dysfunction* or impairment* or decline* or deficit* or function*)).ab,id,ti. | 135041 | XB (cogniti* N1 (disorder* or dysfunction* or impairment* or decline* or deficit* or function*)) | 80,703 | #4 OR #5 | 576816 | (cogniti* NEXT/1 (disorder* OR dysfunction* OR impairment* OR decline* OR deficit* OR function*)):ab,kw,ti | 1237 |
|  | (ADRD or dementia* or Alzheimer* or "mental impairment*" or MCI or "mental deterioration*" or neurodegeneration* or "neuro-degeneration*").ab,kf,kw,ti. | 407046 | (ADRD or dementia* or Alzheimer* or "mental impairment*" or MCI or "mental deterioration*" or neurodegeneration* or "neuro-degeneration*").ab,id,ti. | 148190 | XB (ADRD or dementia* or Alzheimer* or "mental impairment*" or MCI or "mental deterioration*" or neurodegeneration* or "neuro-degeneration*") | 110,878 | #3 AND #6 | 4472 | dementia*:ab,kw,ti OR alzheimer*:ab,kw,ti OR 'mental impairment*':ab,kw,ti OR mci:ab,kw,ti OR 'mental deterioration*':ab,kw,ti | 532222 |
|  | 5 or 6 or 7 | 621433 | 5 or 6 or 7 | 243139 | S5 OR S6 OR S7 | 189,898 | Publication Years: 2025 or 2026 | 616 | #5 OR #6 OR #7 | 890895 |
|  | 4 and 8 | 6396 | 4 and 8 | 5703 | S4 AND S8 | 1,567 |  |  | #4 AND #8 | 13470 |
|  | limit 9 to yr="2025 -Current" | 1241 | limit 9 to yr="2025 -Current" | 546 | Past 12 months | 147 |  |  | #4 AND #8 AND [2025-2026]/py | 1732 |
